# Supplementary material
Source: Elsevier journal article supplement (https://www.sciencedirect.com/science/article/pii/S2605153219300512)
Supplement: mmc1 [file S2605153219300512:mmc1.pdf]

## Supplementary data

### CIE-9 codes for atrial fibrillation definition

|        |                                  |
|--------|----------------------------------|
|        | <b>Atrial fibrillation</b>       |
| 427.31 | Atrial fibrillation              |
| 427.32 | Atrial flutter                   |
|        | <b>Nonvalvular definition</b>    |
|        | <b>Valve diseases</b>            |
| 394.0  | Mitral stenosis                  |
| 394.1  | Rheumatic mitral regurgitation   |
| 395    | Aortic valve diseases            |
| 396    | Mitral and aortic valve diseases |
|        | <b>Mechanical prostheses</b>     |
| 35.22  | Other aortic valve substitution  |
| 35.24  | Other mitral valve substitution  |

### CIE-9 codes for hemorrhage

|        |                                                                            |
|--------|----------------------------------------------------------------------------|
|        | <b>Type of hemorrhage</b>                                                  |
|        | <b>Digestive hemorrhage high</b>                                           |
| 456.0  | Esophageal varices with hemorrhage                                         |
| 456.20 | Esophageal varices with hemorrhage with other disease                      |
| 530.21 | Esophageal ulcer with hemorrhage                                           |
| 530.82 | Esophageal hemorrhage                                                      |
| 531.0  | Acute gastric ulcer with hemorrhage                                        |
| 531.2  | Acute gastric ulcer with hemorrhage and perforation                        |
| 531.4  | Gastric ulcer chronic or unspecified with hemorrhage                       |
| 531.6  | Gastric ulcer chronic or unspecified with hemorrhage and perforation       |
| 535.01 | Acute gastritis with hemorrhage                                            |
| 535.11 | Atrophic gastritis with hemorrhage                                         |
| 535.21 | Gastric mucose hypertrophy with hemorrhage                                 |
| 535.31 | Alcoholic gastritis with hemorrhage                                        |
| 535.41 | Other unspecified gastritis with hemorrhage                                |
| 535.71 | Eosinophilic gastritis with hemorrhage                                     |
| 578.0  | Hematemesis                                                                |
|        | <b>Low</b>                                                                 |
| 532.0  | Acute duodenal ulcer with hemorrhage                                       |
| 532.2  | Acute duodenal ulcer with hemorrhage and perforation                       |
| 532.4  | Duodenal ulcer chronic or unspecified with hemorrhage                      |
| 532.6  | Gastric ulcer chronic or unspecified with hemorrhage and perforation       |
| 533.0  | Acute peptic ulcer with hemorrhage                                         |
| 533.2  | Acute peptic ulcer with hemorrhage and perforation                         |
| 533.4  | Chronic or unspecified peptic ulcer with hemorrhage                        |
| 533.6  | Chronic or unspecified peptic ulcer with hemorrhage and perforation        |
| 534.0  | Acute gastrojejunal ulcer with hemorrhage                                  |
| 534.2  | Acute gastrojejunal ulcer with hemorrhage and perforation                  |
| 534.4  | Chronic or unspecified gastrojejunal ulcer with hemorrhage                 |
| 534.6  | Chronic or unspecified gastrojejunal ulcer with hemorrhage and perforation |
| 535.61 | Duodenitis with hemorrhage                                                 |
| 569.3  | Rectal and anal hemorrhage                                                 |

|        |                                                            |
|--------|------------------------------------------------------------|
| 578.1  | Blood in feces                                             |
|        | <b>Unspecified</b>                                         |
| 535.51 | Gastritis and gastroduodenitis unspecified with hemorrhage |
| 578.9  | Unspecified gastrointestinal bleeding                      |
|        | <b>Respiratory airway hemorrhages</b>                      |
| 786.30 | Hemoptysis, unspecified                                    |
| 786.39 | Other types of hemoptysis                                  |
| 784.8  | Throat hemorrhage                                          |
|        | <b>Cerebral hemorrhages</b>                                |
| 430    | Subarachnoidal hemorrhage                                  |
| 431    | Intracerebral hemorrhage                                   |
| 432    | Other intracranial hemorrhage                              |
|        | <b>Genito-urinary</b>                                      |
| 593.81 | Renal vascular alteration                                  |
| 596.8  | Other bladder alteration                                   |
| 599.7  | Hematuria                                                  |
| 602.1  | Congestion or prostate hemorrhage                          |
| 608.83 | Vascular alteration of the male genitalia                  |
|        | <b>Retinian</b>                                            |
| 362.81 | Retinian hemorrhage                                        |
|        | <b>Gynecological</b>                                       |
| 621.4  | Hematometra                                                |
| 622.8  | Other inflammatory unspecified disorders of the cervix     |
| 623.8  | Other inflammatory unspecified disorders of the vagina     |
| 626.5  | Ovulation hemorrhage                                       |
| 626.6  | Metrorrhagia                                               |
| 626.7  | Postcoital hemorrhage                                      |
| 626.8  | Other menstrual disorder and abnormal hemorrhage           |
| 627.0  | Premenopausal hemorrhage                                   |
| 627.1  | Postmenopausal hemorrhage                                  |
| 666.1  | Other postpartum acute hemorrhage                          |
| 666.2  | Other postpartum subacute or secondary hemorrhage          |
|        | <b>Otorhinolaryngology</b>                                 |
| 388.69 | Other otorrhea                                             |
| 784.7  | Epistaxis                                                  |
|        | <b>Unspecified</b>                                         |
| 285.1  | Post-acute hemorrhagic anemia                              |
| 286.5  | Hemorrhagic disturbances related to anticoagulants         |
| 287.8  | Other hemorrhagic conditions                               |
| 459.0  | Unspecified hemorrhagia                                    |
